# Supplementary material for: Telemedicine Strategy to Rescue CPAP Therapy in Sleep Apnea Patients with Low Treatment Adherence: A Pilot Study
Source: MDPI journal article supplement (doi:10.3390/jcm10184123), 2021-09-13
Supplement: s1 [file s1]

**Table S2. CPAP compliance (h/night)***(patients ordered according to PRE)*

| PRE  | POST | 1-MONTH |
|------|------|---------|
| 0    | 1.14 | 0.15    |
| 0    | 4.14 | 0.02    |
| 0    | 0.04 | 0.04    |
| 0.06 | 4.38 | 3.41    |
| 0.07 | 3.1  | 4.02    |
| 0.15 | 0.55 | 1.09    |
| 0.21 | 4.08 | 4.23    |
| 0.29 | 5.57 | 6.39    |
| 0.31 | 5.22 | 3.47    |
| 0.33 | 4    | 0.31    |
| 0.49 | 1.36 | 2.24    |
| 0.54 | 4.33 | 4.36    |
| 0.71 | 4.1  | 4.44    |
| 0.92 | 1.34 | 3.04    |
| 1.03 | 6.31 | 6.15    |
| 1.03 | 5.41 | 5.35    |
| 1.2  | 6.52 | 6.52    |
| 1.33 | 6.47 | 5.3     |
| 1.34 | 5.22 | 5.08    |
| 1.54 | 5.53 | 6.34    |
| 1.82 | 6.4  | 3.04    |
| 1.9  | 8.15 | 8.31    |
| 2.09 | 3.38 | 3.14    |
| 2.29 | 5.04 | 5.1     |
| 2.59 | 6.38 | 6.5     |
| 2.73 | 5.1  | 4.37    |
| 2.75 | 6.32 | 6.32    |
| 3    | 5.54 | 4.31    |
| 3.14 | 6.05 | 6.26    |
| 3.16 | 7.25 | 6.45    |
| 3.16 | 5.14 | 5.01    |
| 3.23 | 5.24 | 5.11    |
| 3.25 | 4.03 | 3.29    |
| 3.27 | 5.5  | 5.55    |
| 3.49 | 5.59 | 6.37    |
| 3.71 | 5.53 | 5.08    |
| 3.85 | 5.43 | 5.57    |
| 3.92 | 6.29 | 4.2     |
| 4.03 | 4.28 | 4.28    |
| 4.06 | 5.31 | 4.54    |
| 4.17 | 6.4  | 5.19    |

|      |      |      |
|------|------|------|
| 4.2  | 4.4  | 4.41 |
| 4.28 | 4.16 | 2    |
| 4.32 | 6.23 | 5.23 |
| 4.4  | 5.12 | 4.45 |
| 4.49 | 4.5  | 5.19 |
| 4.5  | 5.09 | 4.4  |
| 4.6  | 5.24 | 5.25 |
| 4.69 | 5.3  | 5.28 |
| 4.76 | 6.34 | 7.5  |
| 4.89 | 7.04 | 7.38 |
| 5.11 | 7.34 | 6.59 |
| 5.17 | 7.44 | 7.32 |
| 5.18 | 5.17 | 5.46 |
| 5.38 | 4.49 | 5.13 |
| 5.39 | 6.42 | 6.04 |
